# Supplementary material
Source: PubMed Central journal article supplement (PMC4243967)
Supplement: NIHMS643055-supplement-Supplementary_File.pdf [file NIHMS643055-supplement-Supplementary_File.pdf]

# Influencia de Tornillos de Interferencia Recubiertos de Hidroxiapatita y Liberadores de Factor de Crecimiento en Curación Tendón-Hueso en un Modelo Ovino

Yan Lu, Mark D. Markel, Brett Nemke, J. Sam Lee, Ben K. Graf y William L. Murphy

**Objetivo:** Nuestro objetivo fue determinar si un tornillo de interferencia biorreabsorbible recubierto con una capa mineral con base de hidroxiapatita diseñada para liberar un factor de crecimiento péptido sintético (linkBMP-2 [donde “BMP-2” indica proteína morfogenética ósea 2]) mejoraba la curación hueso-tendón en comparación con un tornillo sin recubrimiento.

**Métodos:** Se usaron péptidos linkBMP-2 etiquetados para cuantificar la eficiencia de la unión y la cinética de liberación en 9 tornillos BIORCI recubiertos con mineral (Smith & Nephew, Andover, MA). Se utilizaron 14 ovejas hembras adultas en este estudio. En cada una de las 14 ovejas, se decidió en forma aleatoria qué babilla recibía un tornillo de interferencia recubierto con linkBMP-2 o uno sin recubrimiento ( $n = 14$  por tratamiento). A las ovejas se les realizó eutanasia 6 semanas después de la cirugía. A ocho ovejas se les hicieron pruebas biomecánicas de carga máxima en falla y rigidez y se usaron seis ovejas para análisis histológico de acuerdo con una escala de puntajes semicuantitativa. **Resultados:** La molécula de linkBMP-2 se unió de manera eficiente a la superficie de los tornillos de interferencia recubiertos con mineral. Más del 80% del linkBMP-2 originalmente unido se liberó durante un período de tiempo de 6 semanas in vitro. La carga máxima en falla en el grupo con tornillo de interferencia recubierto con linkBMP-2 (media  $\pm$  SD,  $449.3 \pm 84.7$  N) no fue significativamente diferente a la del grupo sin recubrimiento ( $421.0 \pm 61.8$  N) ( $P = 0.22$ ). La rigidez en el grupo con tornillo de interferencia recubierto con linkBMP-2 ( $157.3 \pm 39.6$  N/mm) no fue significativamente diferente a la del grupo sin recubrimiento ( $140.6 \pm 20.3$  N/mm) ( $P = 0.12$ ). El análisis histológico mostró que los tendones en el grupo con tornillo de interferencia recubierto con linkBMP-2, tenía puntajes más altos (mejores) que el grupo sin recubrimiento. En el grupo con tornillo de interferencia recubierto con linkBMP-2, había células mesenquimales en la interfaz entre el tornillo y el tendón, mientras que estas células no estaban presentes en el grupo sin recubrimiento.

**Conclusión:** Encontramos que el linkBMP-2 puede unirse a la superficie de un tornillo de interferencia BIORCI recubierto con mineral y ser posteriormente liberado de la superficie del tornillo de manera sostenida. El resultado histológico de este estudio mostró que el tornillo de interferencia recubierto con linkBMP-2 mejoró significativamente los puntajes histológicos de la curación tendón hueso temprana en este modelo ovino. **Relevancia clínica:** Este material de recubrimiento linkBMP-2 puede mejorar la fijación tendón/ligamento temprana. **Palabras Clave:** rhBMP-2—ACL—Curación tendón-hueso—Factores de crecimiento—Tornillo de interferencia—Ovino.
